# Supplementary material
Source: PubMed Central journal article supplement (PMC1855634)
Supplement: aem_73_7_2324__1.pdf [file aem_73_7_2324__1.pdf]

# 1 **Supplemental Material**

## 2 **S1. Methods**

### 3 **Bacterial strains, culture condition, cell fixation and RNase digestion**

4 The following strains were used: *Escherichia coli* K-12 (DM1, Invitrogen), *Bacillus*  
5 *subtilis* (AG174, ATCC) and *Streptococcus mutans* (UA159, ATCC). *E. coli* and  
6 *B. subtilis* strains were cultured at 37°C in Luria-Bertani medium; the *S. mutans*  
7 strain was cultured in Brain Heart Infusion broth. Overnight cultures of the strains  
8 were harvested by centrifugation, washed twice with phosphate-buffered saline  
9 (PBS; pH 7.4). Cells were centrifuged and fixed by addition of freshly-prepared  
10 fixative (methanol/glacial acid, 3:1) and incubated for 15 min at room temperature  
11 and washed twice with fresh fixative. After fixation, the cells were resuspended in  
12 a small amount of fixative and a drop was placed on a clean poly-lysine  
13 microscope slide. The slide was dehydrated through an alcohol series (70%,  
14 90%, 100%) for 2 min each and allowed to air dry. 100 µl RNase A (100 µg/ml)  
15 was placed on slides under a 24x50 mm cover slip and incubated at 37°C for 1  
16 hour. The slide was washed twice with PBS and once in 10 mM sodium  
17 phosphate buffer (pH 7.0) then dehydrated and dried thoroughly.

18

### 19 **Signature sites**

20 Using bacterial genome sequences available from Bacterial Genomes Database  
21 (<ftp://ftp.ncbi.nih.gov/genbank/genomes/Bacteria/>) PD-loop sites with different  
22 distances and sequences between PNA-binding sites can be selected. We  
23 searched for sites  $R_k N_n R_l$  (where R is any purine and N is any base) choosing  $k$

1 and  $l$  between 7 and 8 and  $n$  between 2 and 8. For three bacteria under study  
2 we found that bacterial genomes contain 1913, 4907 and 2077 PD-loop sites for  
3 *E.coli* (4.6Mb genome), *B.subtilis* (4.2Mb), and *S.mutans* (2.0Mb), respectively.  
4 Thus, assuming that the sequence is random, a PD-loop site is estimated to be  
5 found approximately every one thousand base pairs. These PD-loop sites must  
6 be tested to select markers that are unique for each chosen bacterial genome  
7 according to genomic BLAST (<http://www.ncbi.nlm.nih.gov/blast/>), which makes it  
8 possible to search for all sites in all others genomes with the given pattern. We  
9 can expect to find at least 100 signature sites for each of the bacterium under  
10 study, which will allow us to distinguish each of them from other sequenced  
11 bacteria.

12 PNA oligomers are commercially available from PANAGENE (Daejeon, South  
13 Korea). For the present work we used PNA openers from a large library of PNAs  
14 that has been assembled over the years in the Center for Advanced  
15 Biotechnology. These PNAs recognize 7-10-bp-long sites on DNA. We used a  
16 pair of PNA sequences from the library, with an arbitrary spacer between the  
17 PNA binding sites, in order to design unique genomic signature sites for three  
18 bacterial species under study. The chosen signature site was confirmed to be  
19 present in one copy for only one bacterial genome and absent in genomes of the  
20 other two bacteria used in this study. From the list of selected markers, signature  
21 sites were chosen that are mostly located within bacterial genes. Thus, each  
22 signature site was present in a single copy per the bacterial chromosome. The  
23 copy number of chromosomes varied from 1 to 5 copies/cell, depending on the  
24 growth stage of the cells.

1

## 2 **PNA openers, circularizable probes, RCA primers, and decorator probes**

3 Table 1 summarizes the PNAs, circularizable ODNs, primers and decorator  
4 probes used in this study. All PNA samples were obtained as a gift from Dr. P.E.  
5 Nielsen (Copenhagen University) or Applied Biosystems (Foster City, CA). All  
6 primers and labeled probes with a phosphate group (**p**), Cy3 or FITC were  
7 supplied by MWG Biotech (High Point, NC). Circularizable probes carried a  
8 phosphate group at the 5'-end and sequences complementary to target DNA  
9 sites at the 3'- and 5'- ends. They also carried the sequence complementary to  
10 the RCA primer and an arbitrary sequence in the middle, which was designed to  
11 hybridize specific decorator probes to the RCA product and to discriminate  
12 bacterial strains from one another.

13

## 14 **PD-loop assembly, ODN ligation and Rolling Circle Amplification**

15 About 100  $\mu$ l 10mM Na phosphate buffer (pH 7.0) with 0.8  $\mu$ M of each PNAs was  
16 placed on a slide. The slide was covered by 24x50 mm slip and sealed with  
17 rubber cement. Binding of a pair of PNA openers to bacterial chromosomal DNA  
18 was carried out at 37<sup>0</sup> C overnight (~16 hours). After completion of this step, the  
19 rubber cement was gently peeled off and the cover slip was removed. The slide  
20 was washed twice in 10mM Na phosphate buffer (pH 7.0) to remove non-bound  
21 PNAs. The circularizable probe (2  $\mu$ M) was then added and the ligation reaction  
22 was performed by adding 50  $\mu$ l of ligation mixture containing 1x T4 ligase buffer  
23 with 5 u T4 DNA ligase (USB, Cleveland, Ohio) on the slide. The slide was

1 incubated under the cover slip at room temperature for 2 hours. Then, the slide  
2 was washed twice in 2x SSC buffer (30 mM sodium citrate, 300 mM NaCl, pH  
3 7.0) to remove excess of non-ligated ODN and once in buffer A (100 mM  
4 TrisHCl, 150 mM NaCl and 0.05% Tween20).

5 Next, the RCA reaction was performed by adding 50  $\mu$ l of the RCA reaction  
6 mixture containing 2  $\mu$ M of primer, 10 u phi29 DNA polymerase (New England  
7 Biolabs), 200  $\mu$ M dNTPs and 1x phi29 DNA polymerase buffer on the slide. In  
8 addition, the mixture contained 2  $\mu$ M of fluorescently-labeled decorator probe.  
9 Decorator probes contained fluorescent labels on 3'-ends and could not be  
10 extended by DNA polymerase. The slide was covered by a glass slip and sealed  
11 with rubber cement. The RCA reaction was performed at 37<sup>0</sup> C, overnight (~16  
12 hours). Then the slide was washed twice in buffer A and once in 2XT (2x SSC  
13 and 0.05% Tween20) buffer. After a drop of mounting medium, counterstaining  
14 DAPI was added, a coverslip was applied and sealed in place using clear nail  
15 polish.

16

### 17 **Signal detection**

18 Cells and intracellular amplicons were observed on the slides by using the  
19 fluorescence microscope Olympus BX-70 equipped with a Photometrics  
20 KAF1400 cooled charge-coupled device camera and multiple narrow band pass  
21 filters for cy3, cy3.5, cy5, cy5.5, DAPI, and FITC. Fluorescence signals were  
22 captured separately using appropriate filter sets for DAPI, CY3 and FITC. Images  
23 were pseudo-colored, processed and merged using the CytoVision image  
24 software and then stored as digital files.

1 **S2. Negative Controls**

2 **Table 1.** Various negative controls performed. In all cases the experiments were  
 3 performed as described in Methods. All experiments in the table produced no-signal  
 4 patterns similar to one presented in Fig. 2B.

5

| Bacterium           | PNA                       | Circularizable oligonucleotide (ODN) | Decorator | Nature of Control                                             |
|---------------------|---------------------------|--------------------------------------|-----------|---------------------------------------------------------------|
| <i>E.coli</i>       |                           | ODNcspG,<br>ODNrpoN,<br>ODNrnr       | decR      | No PNA                                                        |
|                     | PNA1, PNA2,<br>PNA3, PNA4 |                                      | decR      | No Circularizable ODN                                         |
|                     | PNA1, PNA2,<br>PNA3, PNA4 | ODNcspG,<br>ODNrpoN,<br>ODNrnr       |           | No Decorator                                                  |
|                     | PNA1, PNA2,               | ODNrpoN,<br>ODNrnr                   | decR      | Wrong PNAs                                                    |
|                     | PNA1, PNA2,<br>PNA3, PNA4 | ODNwrong*                            | decR      | Wrong Circularizable ODN                                      |
|                     | PNA1, PNA2,<br>PNA3, PNA4 | ODNcspG,<br>ODNrpoN,<br>ODNrnr       | decW**    | Wrong decorator                                               |
|                     | PNA1, PNA2,               | ODNcspG                              | decR      | No T4 DNA ligase                                              |
|                     | PNA1, PNA2,               | ODNcspG                              | decR      | No phi29 DNA polymerase                                       |
|                     | PNA4, PNA5,<br>PNA6, PNA7 | ODNserA,<br>ODNyxjA                  | decG      | Probes specific to one bacterium are applied to the other one |
|                     | PNA4, PNA6                | ODNhypP                              | decG      |                                                               |
| PNA7, PNA8,<br>PNA9 | ODNdnaK,<br>ODNwapA       | decG                                 |           |                                                               |
| <i>B.subtilis</i>   | PNA1, PNA2,<br>PNA3, PNA4 | ODNcspG,<br>ODNrpoN,<br>ODNrnr       | decR      |                                                               |
| <i>S.mutans</i>     | PNA1, PNA2                | ODNcspG                              | decR      |                                                               |
|                     | PNA3, PNA4                | ODNrpoN,<br>ODNrnr                   | decR      |                                                               |

6

7

\*ODNwrong: 5'-p-gtactttgag(tcacggaatggttacttgcCAGC)CAGCAGCC(TCACggaatggttacttgcagc)gtctcagtgact-3'

8

\*\*decW: 5'-CY3-GGTTACTGCGATTAGCACAAGC-BIOTIN-3'

9

10

11

12

13

14

### 1 **S3. Detection in the clinical/environmental samples**

2 For detection in clinical/environmental samples the *Escherichia coli* (ATCC:  
3 10798) strain was used.

4 Despite efforts towards the development of direct methods for rapid diagnostics  
5 and detection, a direct microscopic visualization of bacterial cells by FISH is still  
6 very difficult, and amplification through culture growth remains the gold standard

7 for bacterial detection. Therefore, we first checked our method for performance  
8 on standard culture media (Trek Diagnostic Systems, Cleveland, OH) by the  
9 standard smear preparation technique. Toward this goal we performed our

10 approach with the probes corresponding to the 21-nt-target site in *E. coli* cold  
11 shock protein gene region (*csp*) on slides with smears made from the culture  
12 media bottles that contains *E. coli* cells (Supplemental Figure 1 A, B). A variety of  
13 standard smear preparation methods such as heat fixation (20 min at 55 °C),  
14 flame fixation, and methanol fixation were all compatible with our technique.

15 Virtually all cells displayed a very bright fluorescent signal indicating that culture  
16 media do not effect bacterial detection by our approach.

17 Our approach also carries promise for direct detection in clinical/environmental  
18 samples without prior bacterial multiplication. However, to realize this promise  
19 our method should be indifferent to various contaminants present in “dirty”  
20 samples. Since we are most interested in clinical/biodefense applications of our  
21 technique, we tested our method on bacteria immersed in human blood. In so  
22 doing we modeled an “infected” blood smear by putting on a polylysine coated  
23 microscope slide a pellet of fresh *E.coli* cells resuspended in one milliliter of

1 expired packed human red blood cells (AB<sup>+</sup>, courtesy of Dr. Karen Quillen of  
2 Transfusion Medicine, Boston Medical Center) (packed red cells). The blood  
3 smear was dried and fixed by immersing the slide in freshly-prepared, ice-cold  
4 fixative and incubated for 15 minutes. The slide was disinfected and dehydrated  
5 through an alcohol series (70%, 90%, 100%) and dried thoroughly. Then the  
6 probe corresponding to the 21-nt-target site in *E.coli* cold shock protein gene  
7 region (csp) was used (Supplemental Figure 1 C, D, E). Very strong signal was  
8 observed for virtually all cells indicating that our approach is capable of detecting  
9 bacteria directly in human blood.

10

11

## 12 **Supplemental Figure 1.**

13

14 Images of *E. coli* bacterial cells with the probes corresponding to the 21-nt-target site in  
15 *E. coli* cold shock protein gene region (csp) (PNA1, PNA2, ODNcspG and decR)  
16 observed by fluorescent microscope in experiments performed directly in culture media  
17 **(A, B)** and human blood **(C - E)**.

18 The fluorescent signals were acquired separately using two filter sets: **(A, C)** DAPI only;  
19 **(D)** only Cy3 for the labeled RCA product; **(B, E)** superposition of two separate images  
20 with DAPI and Cy3. Signals pseudocolored in blue for DAPI and red for Cy3.

1  
2

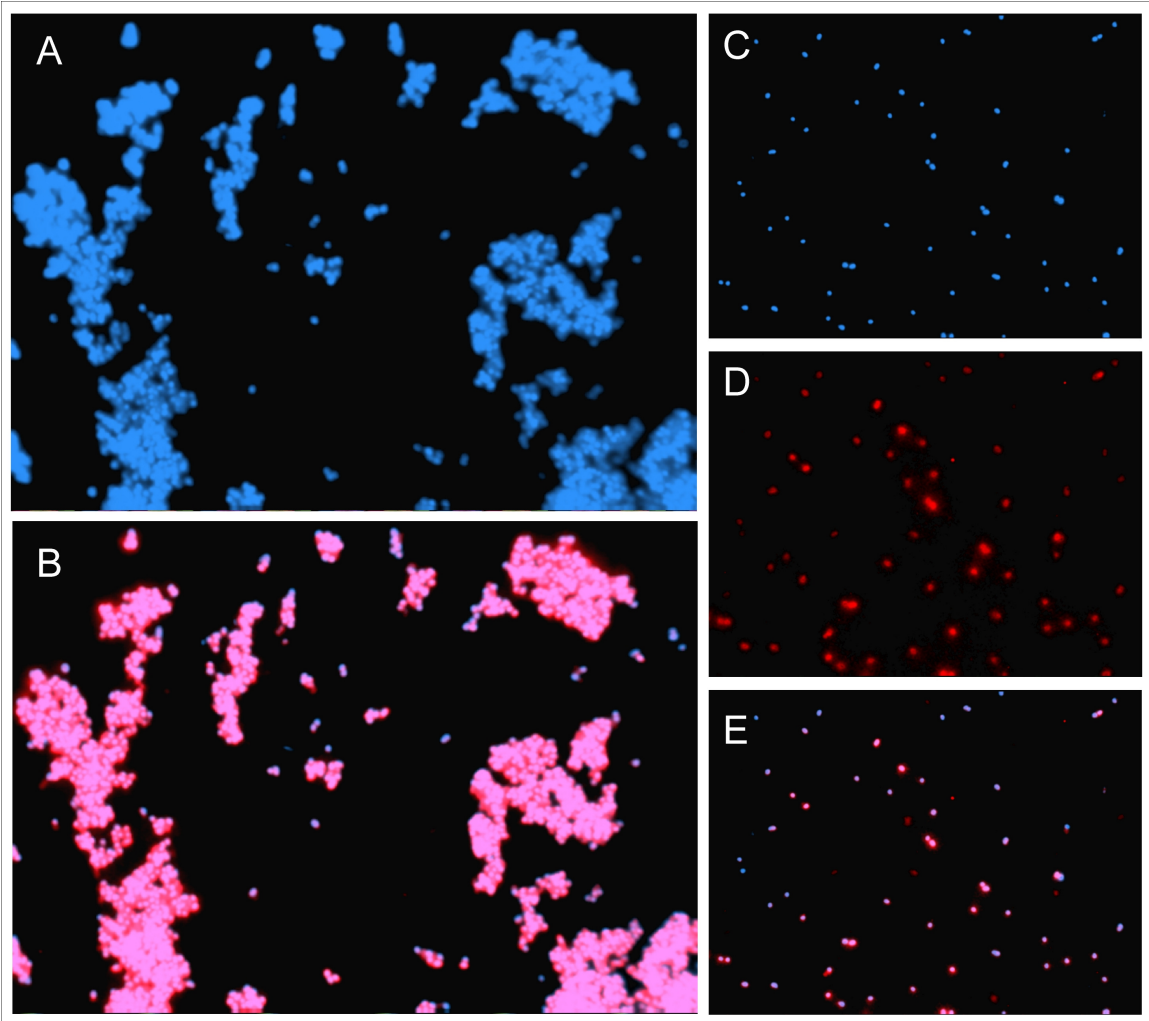

3  
4  
5  
6  
7  
8

Supplemental Figure 1 (Smolina et al)
